# Supplementary material
Source: MDPI journal article supplement (https://www.mdpi.com/2075-163X/12/7/893)
Supplement: s1 [file s1]

### Supplementary materials

**Table S1** CR sample locations, labels and thickness.

| latitude    | longitude   | location     | labels from bottom to top                                                                                                         | thickness |
|-------------|-------------|--------------|-----------------------------------------------------------------------------------------------------------------------------------|-----------|
| 43°08'11" N | 13°53'29" E | Camporotondo | CR-1, CR-2-bottom, CR-2-middle,<br>CR-2-top, CR-3-bottom, CR-3-top,<br>CR-4, CR-5, CR-5a, CR-6, CR-7,<br>CR-8, CR-9, CR-10, CR-11 | ~ 170 cm  |

**Table S2** Sites of VRL5.5 reported in previous studies.

| location             | label | encasing formation                            | reference                                                                |
|----------------------|-------|-----------------------------------------------|--------------------------------------------------------------------------|
| Bisenti              | B     | Laga Fm.,<br>post-evaporitic member           | Trua et alii, 2010                                                       |
| Civitella del Tronto | CV    | Laga Fm.,<br>post-evaporitic member           | Trua et alii, 2010                                                       |
| Colle Gallo          | CG    | Laga Fm.,<br>post-evaporitic member           | Trua et alii, 2010; Carloni et alii, 1974                                |
| Amandola             | A     | Laga Fm.,<br>post-evaporitic member           | Guerrera et alii, 1986                                                   |
| Camporotondo         | CR    | Laga Fm.,<br>post-evaporitic member           | Trua et alii, 2010; Carloni et alii, 1974; Bassetti et alii, 1994        |
| Maccarone            | M     | San Donato Fm.                                | Trua et alii, 2010; Carloni et alii, 1974; Bassetti et alii, 1994        |
| Calcinelli           | A     | San Donato Fm.                                | Guerrera et alii, 1986                                                   |
| Santa Marina         | SM    | San Donato Fm.                                | Trua et alii, 2010                                                       |
| Casteldimezzo        | CM    | San Donato Fm.                                | Trua et alii, 2010                                                       |
| Piavola              | P     | Di Tetto Fm.                                  | Trua et alii, 2010; Cremonini and Farabegoli, 1982; Roveri et alii, 1998 |
| Campea               | C     | Di Tetto Fm.                                  | Trua et alii, 2010; Cremonini and Farabegoli, 1982                       |
| Serredi quarry       | SQ    | Argille e gessi del Fiume<br>Era Morta Fm. SQ | Aldinucci et alii, 2005                                                  |

**Table S3.** Bulk compositions of selected samples rich in volcanic phases.

| major oxides (wt.%)            | CR-1 | CR-3-top | CR-11 | average | st. dev. |
|--------------------------------|------|----------|-------|---------|----------|
| SiO <sub>2</sub>               | 66,5 | 66,5     | 61,3  | 64,8    | 3,0      |
| TiO <sub>2</sub>               | 0,2  | 0,2      | 0,3   | 0,2     | 0,1      |
| Al <sub>2</sub> O <sub>3</sub> | 12,4 | 11,9     | 12,2  | 12,2    | 0,2      |
| Fe <sub>2</sub> O <sub>3</sub> | 1,4  | 0,9      | 1,3   | 1,2     | 0,3      |
| FeO                            | 1,3  | 1,4      | 1,5   | 1,4     | 0,1      |
| MnO                            | 0,0  | 0,0      | 0,0   | 0,0     | 0,0      |
| MgO                            | 1,7  | 1,4      | 1,9   | 1,7     | 0,3      |
| CaO                            | 2,3  | 2,5      | 5,3   | 3,4     | 1,7      |
| Na <sub>2</sub> O              | 2,8  | 2,9      | 2,2   | 2,6     | 0,4      |
| K <sub>2</sub> O               | 2,6  | 2,5      | 2,5   | 2,5     | 0,0      |
| alkalis                        | 5,3  | 5,4      | 4,7   | 5,1     | 0,4      |
| tot                            | 91,1 | 90,2     | 88,5  | 89,9    | 1,3      |

|                                                       |       |      |      |       |     |
|-------------------------------------------------------|-------|------|------|-------|-----|
| CO <sub>2</sub>                                       | 1,3   | 1,8  | 3,4  | 2,2   | 1,1 |
| H <sub>2</sub> O-                                     | 1,3   | 0,9  | 1,3  | 1,2   | 0,2 |
| H <sub>2</sub> O+                                     | 6,6   | 6,4  | 6,1  | 6,4   | 0,3 |
| H <sub>2</sub> O                                      | 7,9   | 7,3  | 7,4  | 7,5   | 0,3 |
| S                                                     | 0,1   | 0,1  | 0,1  | 0,1   | 0,0 |
| CO <sub>2</sub> +H <sub>2</sub> O+S                   | 9,3   | 9,1  | 10,9 | 9,8   | 1,0 |
| major oxides +<br>CO <sub>2</sub> +H <sub>2</sub> O+S | 100,3 | 99,3 | 99,4 | 99,7  | 0,6 |
| LOI                                                   | 9,5   | 9,5  | 11,4 | 10,1  | 1,1 |
| major oxides<br>+ LOI                                 | 100,6 | 99,6 | 99,9 | 100,0 | 0,5 |

Footnotes: H<sub>2</sub>O- is moisture, determined at 105 °C; H<sub>2</sub>O+ is structural water, determined at 1000 °C; LOI = Loss of Ignition.

**Table S4.** Trace elements from bulk analysis of selected CR samples and literature (where available).

| trace elements<br>(ppm) | this study |          |       |        | Trua et alii, 2010 |     |     |     |     | Aldinucci et alii,<br>2005 |
|-------------------------|------------|----------|-------|--------|--------------------|-----|-----|-----|-----|----------------------------|
|                         | CR-1       | CR-3 top | CR-11 | CAC-3b | P                  | SM  | CM  | M16 | CR  | SQ                         |
| Be                      | 3          | 4        | 3     | 3      | -                  | -   | -   | -   | -   | 8                          |
| Sc                      | 5          | 6        | 6     | 7      | -                  | -   | -   | -   | -   | 4                          |
| V                       | 8          | 14       | 8     | 15     | 7                  | 11  | 24  | 6   | 21  | 2                          |
| Cr                      | < 20       | 50       | < 20  | < 20   | -                  | -   | -   | -   | -   | 2                          |
| Co                      | 2          | 2        | < 1   | 2      | -                  | -   | -   | -   | -   | 0                          |
| Ni                      | 6          | 29       | 2     | 7      | -                  | -   | -   | -   | -   | -                          |
| Cu                      | 22         | 26       | 23    | 20     | -                  | -   | -   | -   | -   | 9                          |
| Zn                      | 78         | 89       | 77    | 107    | -                  | -   | -   | -   | -   | -                          |
| Ga                      | 16         | 17       | 17    | 17     | -                  | -   | -   | -   | -   | 21                         |
| Ge                      | 1          | 1        | 1     | 1      | -                  | -   | -   | -   | -   | -                          |
| As                      | 46         | 34       | 34    | 35     | -                  | -   | -   | -   | -   | -                          |
| Rb                      | 134        | 143      | 78    | 72     | 60                 | 160 | 142 | 167 | 100 | 293                        |
| Sr                      | 438        | 700      | 2470  | 2833   | 107                | 138 | 351 | 147 | 171 | 16                         |
| Y                       | 25         | 27       | 26    | 25     | 25                 | 28  | 26  | 31  | 28  | 52                         |
| Zr                      | 101        | 161      | 149   | 123    | 152                | 139 | 190 | 104 | 129 | 216                        |
| Nb                      | 7          | 9        | 7     | 8      | nd                 | nd  | 10  | 8   | nd  | 14                         |
| Mo                      | < 2        | < 2      | < 2   | < 2    | -                  | -   | -   | -   | -   | -                          |
| Ag                      | < 0,5      | 0,6      | 0,5   | 0,5    | -                  | -   | -   | -   | -   | -                          |
| Cd                      | < 0,5      | < 0,5    | < 0,5 | < 0,5  | -                  | -   | -   | -   | -   | -                          |
| In                      | < 0,2      | < 0,2    | < 0,2 | < 0,2  | -                  | -   | -   | -   | -   | -                          |
| Sn                      | 9          | 9        | 8     | 9      | -                  | -   | -   | -   | -   | -                          |
| Sb                      | 4,2        | 2,8      | 2,9   | 4,1    | -                  | -   | -   | -   | -   | -                          |
| Cs                      | 19,1       | 20,6     | 14,8  | 12,5   | 17                 | 24  | 15  | 20  | 21  | 49                         |
| Ba                      | 425        | 532      | 428   | 345    | 384                | 683 | 524 | 661 | 426 | 297                        |
| La                      | 42,7       | 44,5     | 42,4  | 39,6   | 48                 | 46  | 40  | 45  | 50  | 60                         |
| Ce                      | 84,9       | 88,0     | 82,3  | 76,5   | 84                 | 79  | 80  | 87  | 90  | 126                        |
| Pr                      | 9,18       | 9,62     | 9,21  | 8,70   | nd                 | nd  | 9   | 9   | nd  | 14                         |
| Nd                      | 32,2       | 34,0     | 32,8  | 30,7   | 29                 | 25  | 31  | 33  | 30  | 50                         |
| Sm                      | 6,2        | 6,8      | 6,6   | 6,2    | 6                  | 6   | 6   | 7   | 6   | 10                         |
| Eu                      | 0,43       | 0,53     | 0,52  | 0,57   | 1                  | 1   | 1   | nd  | 1   | 0                          |
| Gd                      | 5,2        | 5,4      | 5,5   | 5,3    | nd                 | nd  | 5   | 6   | nd  | 8                          |
| Tb                      | 0,8        | 0,9      | 0,8   | 0,8    | 1                  | 1   | 1   | 1   | 1   | 1                          |
| Dy                      | 4,8        | 5,2      | 5,1   | 4,9    | nd                 | nd  | 5   | 6   | nd  | 8                          |

|    |      |       |      |      |    |    |    |    |    |    |
|----|------|-------|------|------|----|----|----|----|----|----|
| Ho | 0,9  | 1,0   | 0,9  | 0,9  | nd | nd | 1  | 1  | nd | 2  |
| Er | 2,7  | 2,8   | 2,8  | 2,6  | nd | nd | 3  | 3  | nd | 5  |
| Tm | 0,39 | 0,43  | 0,40 | 0,41 | nd | nd | nd | nd | nd | 1  |
| Yb | 2,6  | 2,8   | 2,5  | 2,5  | 3  | 3  | 3  | 3  | 3  | 5  |
| Lu | 0,39 | 0,42  | 0,37 | 0,35 | nd | nd | nd | nd | nd | 1  |
| Hf | 3,8  | 5,1   | 4,7  | 4,1  | 4  | 4  | 6  | 4  | 4  | 8  |
| Ta | 1,0  | 1,0   | 1,0  | 0,9  | 1  | 1  | 1  | 1  | 1  | 2  |
| W  | 5    | 5     | 24   | 3    | -  | -  | -  | -  | -  | -  |
| Tl | 0,7  | 0,8   | 0,5  | 0,6  | -  | -  | -  | -  | -  | 3  |
| Pb | 70   | 80    | 59   | 76   | 78 | 55 | 49 | 83 | 90 | 59 |
| Bi | 0,4  | < 0,4 | 0,4  | 0,6  | -  | -  | -  | -  | -  | -  |
| Th | 24,4 | 23,8  | 22,6 | 21,4 | 24 | 24 | 19 | 22 | 26 | 51 |
| U  | 6,6  | 6,1   | 6,1  | 5,9  | 7  | 6  | 7  | 7  | 7  | 14 |

**Table S5** Micro-chemical composition of glassy matrixes determined by EPMA (raw data)

| major<br>oxides<br>(wt.%)      | this study   |                       |                   |                   |             |              |              |              |          |           | Trua et alii, 2010 |           |            |            |      | Carloni et<br>alii, 1974 |      |              | Guerrera et<br>alii, 1986 |      |      |      | Aldinucci<br>et<br>alii, 2005 |  |
|--------------------------------|--------------|-----------------------|-------------------|-------------------|-------------|--------------|--------------|--------------|----------|-----------|--------------------|-----------|------------|------------|------|--------------------------|------|--------------|---------------------------|------|------|------|-------------------------------|--|
|                                | CR           |                       |                   |                   |             |              |              |              |          |           |                    |           |            |            |      |                          |      |              |                           |      |      |      |                               |  |
|                                | CR-1<br>(10) | CR-2-bot-<br>tom (14) | CR-2-<br>top (12) | CR-3-<br>top (10) | CR-5<br>(8) | CR-7<br>(13) | CR-9<br>(16) | CR-11<br>(8) | average  | P<br>(18) | SM<br>(35)         | CM<br>(2) | M16<br>(5) | CR<br>(10) | CG   | M                        | CR   | A<br>(Log45) | CA<br>(Log46)             | SQ   |      |      |                               |  |
| SiO <sub>2</sub>               | 73,0<br>(4)  | 73,0 (6)              | 72,8 (6)          | 73,0 (7)          | 73,2 (6)    | 72,9 (9)     | 73,1 (1)     | 72,1 (6)     | 72,9 (3) | 72,3 (7)  | 71,9 (1)           | 71,7 (0)  | 71,4 (5)   | 71,9 (2)   | 70,3 | 70,6                     | 70,6 | 73,1         | 70,8                      | 71,4 | 70,5 | 64,8 | 73,8                          |  |
| TiO <sub>2</sub>               | 0,1 (0)      | 0,1 (0)               | 0,1 (0)           | 0,1 (0)           | 0,1 (0)     | 0,1 (0)      | 0,1 (0)      | 0,1 (0)      | 0,1 (0)  | 0,1 (0)   | 0,1 (0)            | 0,1 (0)   | 0,1 (0)    | 0,1 (0)    | 0,1  | 0,1                      | 0,1  | 0,1          | 0,1                       | 0,1  | 0    | 0,1  | 0,1                           |  |
| Al <sub>2</sub> O <sub>3</sub> | 12,3<br>(1)  | 12,4 (3)              | 12,3 (4)          | 12,5 (4)          | 12,0 (3)    | 12,0 (4)     | 12,2 (3)     | 11,9 (3)     | 12,2 (2) | 12,4 (3)  | 12,7 (2)           | 12,7 (0)  | 12,7 (1)   | 12,6 (0)   | 13,5 | 13,6                     | 13,4 | 12,9         | 13,7                      | 13,3 | 12,5 | 14,4 | 15,5                          |  |
| FeO                            | 1,2 (1)      | 1,2 (1)               | 1,2 (2)           | 0,9 (1)           | 1,1 (1)     | 1,2 (1)      | 1,3 (2)      | 1,2 (1)      | 1,2 (1)  | 1,2 (1)   | 1,1 (1)            | 1,2 (1)   | 1,1 (0)    | 1,1 (1)    | 0,4  | 0,3                      | 0,2  | 1,2          | 1,2                       | 0    | 0    | 1,5  | 2,2                           |  |
| MnO                            | 0,0 (0)      | 0,0 (0)               | 0,0 (0)           | 0,1 (0)           | 0,0 (0)     | 0,0 (0)      | 0,0 (0)      | 0,1 (0)      | 0,0 (0)  | 0,0 (0)   | 0,0 (0)            | 0,1 (0)   | 0,0 (0)    | 0,0 (0)    | 0    | 0                        | 0    | 0            | 0                         | 0    | 0    | 0,2  | 0                             |  |
| MgO                            | 0,1 (0)      | 0,1 (0)               | 0,1 (0)           | 0,1 (0)           | 0,1 (0)     | 0,1 (0)      | 0,1 (0)      | 0,1 (0)      | 0,1 (0)  | 0,0 (0)   | 0,1 (0)            | 0,1 (0)   | 0,1 (0)    | 0,0 (0)    | 0,4  | 0,4                      | 0,4  | 0,1          | 0,1                       | 0    | 0,1  | 1,0  | 0,2                           |  |
| CaO                            | 0,7 (0)      | 0,7 (1)               | 0,7 (1)           | 0,7 (0)           | 0,7 (0)     | 0,8 (0)      | 0,8 (1)      | 0,7 (0)      | 0,7 (0)  | 0,7 (1)   | 0,8 (1)            | 0,8 (0)   | 0,8 (0)    | 0,7 (0)    | 1,0  | 0,9                      | 0,8  | 0,7          | 1,0                       | 0,8  | 3,2  | 2,3  | 1,2                           |  |
| Na <sub>2</sub> O              | 3,9 (1)      | 3,9 (2)               | 3,7 (3)           | 4,7 (2)           | 3,8 (2)     | 3,8 (2)      | 3,9 (1)      | 4,0 (3)      | 4,0 (3)  | 3,3 (3)   | 3,2 (3)            | 3,4 (1)   | 3,4 (2)    | 3,6 (2)    | 4,0  | 3,7                      | 4,1  | 1,9          | 2,2                       | 2,6  | 1,3  | 2,3  | 2,8                           |  |
| K <sub>2</sub> O               | 2,4 (2)      | 2,5 (2)               | 2,4 (5)           | 2,2 (2)           | 2,3 (1)     | 2,4 (1)      | 2,4 (2)      | 2,5 (2)      | 2,4 (1)  | 2,3 (1)   | 3,6 (2)            | 3,2 (0)   | 4,2 (3)    | 2,3 (2)    | 2,9  | 3,2                      | 2,5  | 2,3          | 2,5                       | 2,6  | 1,3  | 4,2  | 3,8                           |  |
| alkalis                        | 6,3 (3)      | 6,4 (4)               | 6,2 (4)           | 7,0 (4)           | 6,1 (2)     | 6,1 (3)      | 6,3 (3)      | 6,5 (4)      | 6,4 (3)  | 5,5 (2)   | 6,8 (2)            | 6,6 (1)   | 7,6 (2)    | 5,9 (2)    | 6,9  | 6,9                      | 6,5  | 4,2          | 4,7                       | 5,1  | 2,6  | 6,5  | 6,6                           |  |
| tot<br>FeO                     | 93,7<br>(6)  | 94,0 (9)              | 93,4 (6)          | 94,3 (13)         | 93,4 (5)    | 93,3 (7)     | 93,9 (8)     | 92,8 (7)     | 93,6 (5) | 92,4 (3)  | 93,5 (7)           | 93,2 (3)  | 93,8 (7)   | 92,5 (4)   | 92,6 | 92,8                     | 92,1 | 92,4         | 91,6                      | 90,7 | 88,7 | 90,8 | 100                           |  |

Footnotes: in brackets with the oxide value the standard deviation. Fe<sub>2</sub>O<sub>3</sub> is a recalculation from FeO , as a ratio by atomic weights (Fe<sub>2</sub>O<sub>3</sub>=FeO\*1,1111). Values for Aldinucci et alii, 2005 should be a dry recalculation, even if not specified in the original paper.

**Table S6.** Micro-chemical composition of glassy matrixes determined by EPMA (100wt% dry recalculation).

| major<br>ox-<br>ides<br>(wt.%<br>) | this study   |                       |                  |                   |             |              |              |              |              |           | Trua et alii, 2010 |           |            |            |       | Carlioni et alii, 1974 |       |              | Guerrera et alii, 1986 |       |       |       | Aldinucci et alii, 2005 |
|------------------------------------|--------------|-----------------------|------------------|-------------------|-------------|--------------|--------------|--------------|--------------|-----------|--------------------|-----------|------------|------------|-------|------------------------|-------|--------------|------------------------|-------|-------|-------|-------------------------|
|                                    | CR           |                       |                  |                   |             |              |              |              |              |           |                    |           |            |            |       |                        |       |              |                        |       |       |       |                         |
|                                    | CR-1<br>(10) | CR-2-bot-<br>tom (14) | CR-2-top<br>(12) | CR-3-<br>top (10) | CR-5<br>(8) | CR-7<br>(13) | CR-9<br>(16) | CR-11<br>(8) | aver-<br>age | P<br>(18) | SM<br>(35)         | CM<br>(2) | M16<br>(5) | CR<br>(10) | CG    | M                      | CR    | A<br>(Log45) | CA<br>(Log46)          |       | SQ    |       |                         |
| SiO <sub>2</sub>                   | 77,9<br>(2)  | 77,6 (5)              | 77,9 (8)         | 77,4 (7)          | 78,3 (5)    | 78,1 (7)     | 77,8 (7)     | 77,7 (6)     | 77,8 (3)     | 78,2 (7)  | 76,9 (5)           | 77,0 (2)  | 76,1 (2)   | 77,7 (4)   | 75,1  | 75,2                   | 75,5  | 79,2         | 77,3                   | 78,7  | 79,4  | 71,4  | 73,8                    |
| TiO <sub>2</sub>                   | 0,1<br>(0)   | 0,1 (0)               | 0,1 (0)          | 0,1 (0)           | 0,1 (1)     | 0,1 (1)      | 0,1 (0)      | 0,1 (1)      | 0,1 (0)      | 0,1 (0)   | 0,1 (0)            | 0,1 (0)   | 0,1 (0)    | 0,1 (0)    | 0,1   | 0,1                    | 0,1   | 0,1          | 0,1                    | 0,1   | 0,0   | 0,1   | 0,1                     |
| Al <sub>2</sub> O <sub>3</sub>     | 13,1<br>(1)  | 13,2 (2)              | 13,2 (4)         | 13,3 (3)          | 12,9 (3)    | 12,9 (4)     | 13,0 (4)     | 12,9 (3)     | 13,0 (2)     | 13,4 (4)  | 13,6 (2)           | 13,6 (0)  | 13,5 (1)   | 13,6 (2)   | 14,5  | 14,5                   | 14,3  | 14,0         | 14,9                   | 14,6  | 14,0  | 15,8  | 15,5                    |
| FeO                                | 1,2<br>(1)   | 1,3 (1)               | 1,3 (2)          | 1,0 (1)           | 1,2 (1)     | 1,3 (1)      | 1,4 (2)      | 1,3 (1)      | 1,2 (1)      | 1,3 (1)   | 1,2 (1)            | 1,3 (1)   | 1,2 (1)    | 1,2 (1)    | 1,4   | 1,5                    | 1,7   | 1,3          | 1,3                    | 0,0   | 0,1   | 1,6   | 2,2                     |
| MnO                                | 0,0<br>(0)   | 0,0 (0)               | 0,0 (0)          | 0,1 (0)           | 0,0 (0)     | 0,0 (0)      | 0,0 (0)      | 0,1 (0)      | 0,0 (0)      | 0,1 (0)   | 0,1 (0)            | 0,1 (0)   | 0,1 (0)    | 0,1 (0)    | 0,0   | 0,0                    | 0,0   | 0,0          | 0,0                    | 0,0   | 0,0   | 0,2   | 0,0                     |
| MgO                                | 0,1<br>(0)   | 0,1 (0)               | 0,1 (0)          | 0,1 (0)           | 0,1 (0)     | 0,1 (0)      | 0,1 (0)      | 0,1 (0)      | 0,1 (0)      | 0,0 (0)   | 0,0 (0)            | 0,1 (0)   | 0,0 (0)    | 0,0 (0)    | 0,4   | 0,4                    | 0,4   | 0,1          | 0,2                    | 0,0   | 0,1   | 1,1   | 0,2                     |
| CaO                                | 0,8<br>(0)   | 0,8 (1)               | 0,8 (1)          | 0,7 (1)           | 0,8 (0)     | 0,8 (1)      | 0,9 (2)      | 0,8 (1)      | 0,8 (0)      | 0,8 (1)   | 0,8 (1)            | 0,8 (0)   | 0,8 (0)    | 0,8 (0)    | 1,0   | 0,9                    | 0,9   | 0,8          | 1,1                    | 0,8   | 3,6   | 2,6   | 1,2                     |
| Na <sub>2</sub> O                  | 4,1<br>(1)   | 4,2 (2)               | 4,0 (3)          | 5,0 (2)           | 4,0 (2)     | 4,0 (2)      | 4,1 (2)      | 4,3 (3)      | 4,2 (3)      | 3,5 (3)   | 3,4 (3)            | 3,7 (1)   | 3,6 (2)    | 3,9 (2)    | 4,3   | 3,9                    | 4,3   | 2,1          | 2,4                    | 2,8   | 1,5   | 2,6   | 2,8                     |
| K <sub>2</sub> O                   | 2,6<br>(2)   | 2,7 (3)               | 2,6 (5)          | 2,4 (2)           | 2,5 (1)     | 2,5 (1)      | 2,6 (2)      | 2,7 (2)      | 2,6 (1)      | 2,5 (1)   | 3,8 (2)            | 3,4 (1)   | 4,5 (3)    | 2,5 (3)    | 3,1   | 3,4                    | 2,6   | 2,5          | 2,7                    | 2,8   | 1,4   | 4,7   | 3,8                     |
| alka-<br>lis                       | 6,7<br>(3)   | 6,9 (4)               | 6,6 (4)          | 7,4 (4)           | 6,5 (2)     | 6,6 (3)      | 6,7 (3)      | 7,0(4)       | 6,8 (3)      | 6,0 (3)   | 7,2 (5)            | 7,1 (2)   | 8,1 (5)    | 6,4 (5)    | 7,3   | 7,3                    | 7,0   | 4,6          | 5,1                    | 5,7   | 2,9   | 7,2   | 6,6                     |
| tot<br>FeO                         | 100,0        | 100,0                 | 100,0            | 100,0             | 100,0       | 100,0        | 100,0        | 100,0        | 100,0        | 100,0     | 100,0              | 100,0     | 100,0      | 100,0      | 100,0 | 100,0                  | 100,0 | 100,0        | 100,0                  | 100,0 | 100,0 | 100,0 | 100,0                   |

**Table S7.** Micro-chemical composition of a Dumfriesshire augite from the Micro-Analysis Consultant, run as a standard, de-termined by EPMA.

| major.<br>oxides<br>(wt.%)     | augite<br>01 | augite<br>02 | augite<br>03 | augite<br>04 | augite<br>05 | augite<br>06 | augite<br>07 | augite<br>08 | augite<br>09 | augite<br>10 | augite<br>11 | augite<br>12 | augite<br>13 | augite<br>14 | augite<br>15 | augite 16 | average<br>(st.dev.) |
|--------------------------------|--------------|--------------|--------------|--------------|--------------|--------------|--------------|--------------|--------------|--------------|--------------|--------------|--------------|--------------|--------------|-----------|----------------------|
| SiO <sub>2</sub>               | 47,2         | 47,8         | 47,5         | 47,8         | 47,4         | 47,8         | 47,5         | 48,0         | 47,4         | 48,1         | 47,7         | 47,9         | 48,2         | 48,1         | 47,9         | 47,8      | 47,7 (3)             |
| TiO <sub>2</sub>               | 1,2          | 1,1          | 1,2          | 1,0          | 1,1          | 1,1          | 1,1          | 1,2          | 1,1          | 1,3          | 1,2          | 1,0          | 1,2          | 1,2          | 1,2          | 1,2       | 1,1 (1)              |
| Al <sub>2</sub> O <sub>3</sub> | 7,3          | 7,8          | 7,5          | 7,3          | 7,3          | 7,4          | 7,4          | 7,2          | 7,4          | 7,0          | 7,3          | 7,3          | 6,6          | 6,6          | 6,5          | 6,8       | 7,2 (4)              |
| FeO                            | 7,7          | 7,8          | 7,4          | 7,5          | 7,6          | 7,4          | 7,7          | 7,9          | 7,7          | 7,5          | 7,6          | 7,7          | 7,4          | 7,3          | 7,5          | 7,6       | 7,6 (2)              |
| MnO                            | 0,2          | 0,1          | 0,1          | 0,1          | 0,2          | 0,1          | 0,1          | 0,2          | 0,2          | 0,2          | 0,2          | 0,1          | 0,1          | 0,1          | 0,2          | 0,2       | 0,1 (0)              |
| MgO                            | 13,9         | 13,7         | 13,6         | 13,7         | 13,8         | 13,9         | 14,0         | 13,7         | 14,0         | 14,0         | 13,9         | 14,2         | 14,0         | 14,0         | 13,9         | 13,9      | 13,9 (2)             |
| CaO                            | 22,0         | 22,0         | 22,3         | 22,3         | 22,3         | 21,9         | 22,4         | 22,2         | 22,0         | 21,9         | 22,3         | 22,0         | 22,5         | 22,4         | 22,5         | 22,3      | 22,2 (2)             |
| Na <sub>2</sub> O              | 0,5          | 0,5          | 0,5          | 0,5          | 0,5          | 0,4          | 0,5          | 0,4          | 0,5          | 0,5          | 0,6          | 0,4          | 0,4          | 0,5          | 0,4          | 0,5       | 0,5 (1)              |
| K <sub>2</sub> O               | 0,0          | 0,0          | 0,0          | 0,0          | 0,0          | 0,0          | 0,0          | 0,0          | 0,0          | 0,0          | 0,0          | 0,0          | 0,0          | 0,0          | 0,0          | 0,0       | 0,0 (0)              |
| tot FeO                        | 99,9         | 100,7        | 100,0        | 100,1        | 100,1        | 100,1        | 100,7        | 100,7        | 100,4        | 100,6        | 100,7        | 100,6        | 100,3        | 100,1        | 100,0        | 100,4     | 100,3 (3)            |

**Table S8.** Grain-size statistical parameters derived from image analysis.

| parameter       | CR-1  | CR-2-bottom | CR-2-top | CR-3-top | CR-5  | CR-7  | CR-9  | CR-11 | average(st. dev.) |
|-----------------|-------|-------------|----------|----------|-------|-------|-------|-------|-------------------|
| M <sub>z</sub>  | 5,85  | 5,87        | 5,71     | 5,68     | 5,60  | 5,61  | 5,66  | 5,78  | 5,72(9)           |
| σ <sub>i</sub>  | 0,67  | 0,58        | 0,66     | 0,71     | 0,85  | 0,81  | 0,66  | 0,66  | 0,70(9)           |
| SK <sub>i</sub> | -0,18 | -0,15       | -0,12    | -0,15    | -0,20 | -0,18 | -0,12 | -0,14 | -0,16(3)          |
| K <sub>G</sub>  | 1,00  | 0,97        | 0,86     | 1,00     | 1,05  | 0,93  | 0,88  | 0,99  | 0,96(7)           |

Footnotes: M<sub>z</sub> graphic mean; σ<sub>i</sub> inclusive graphic standard deviation; SK<sub>i</sub> inclusive graphic skewness; K<sub>G</sub> graphic kurtosis as reported in [Baiyegunhi et alii, 2017](#), [Merico et alii, 2020](#). Numbers in brackets are standard deviations.  $M_z = (\Phi_{16} + \Phi_{50} + \Phi_{84}) / 3$ ;  $\sigma_i = [(\Phi_{84} - \Phi_{16}) / 4] + [(\Phi_{95} - \Phi_5) / 6.6]$ ;  $SK_i = \{(\Phi_{84} + \Phi_{16} - 2\Phi_{50}) / [2(\Phi_{84} - \Phi_{16})]\} + \{(\Phi_{95} + \Phi_5 - 2\Phi_{50}) / [2(\Phi_{95} - \Phi_5)]\}$ ;  $K_G = (\Phi_{95} - \Phi_5) / [2.44(\Phi_{75} - \Phi_{25})]$ .

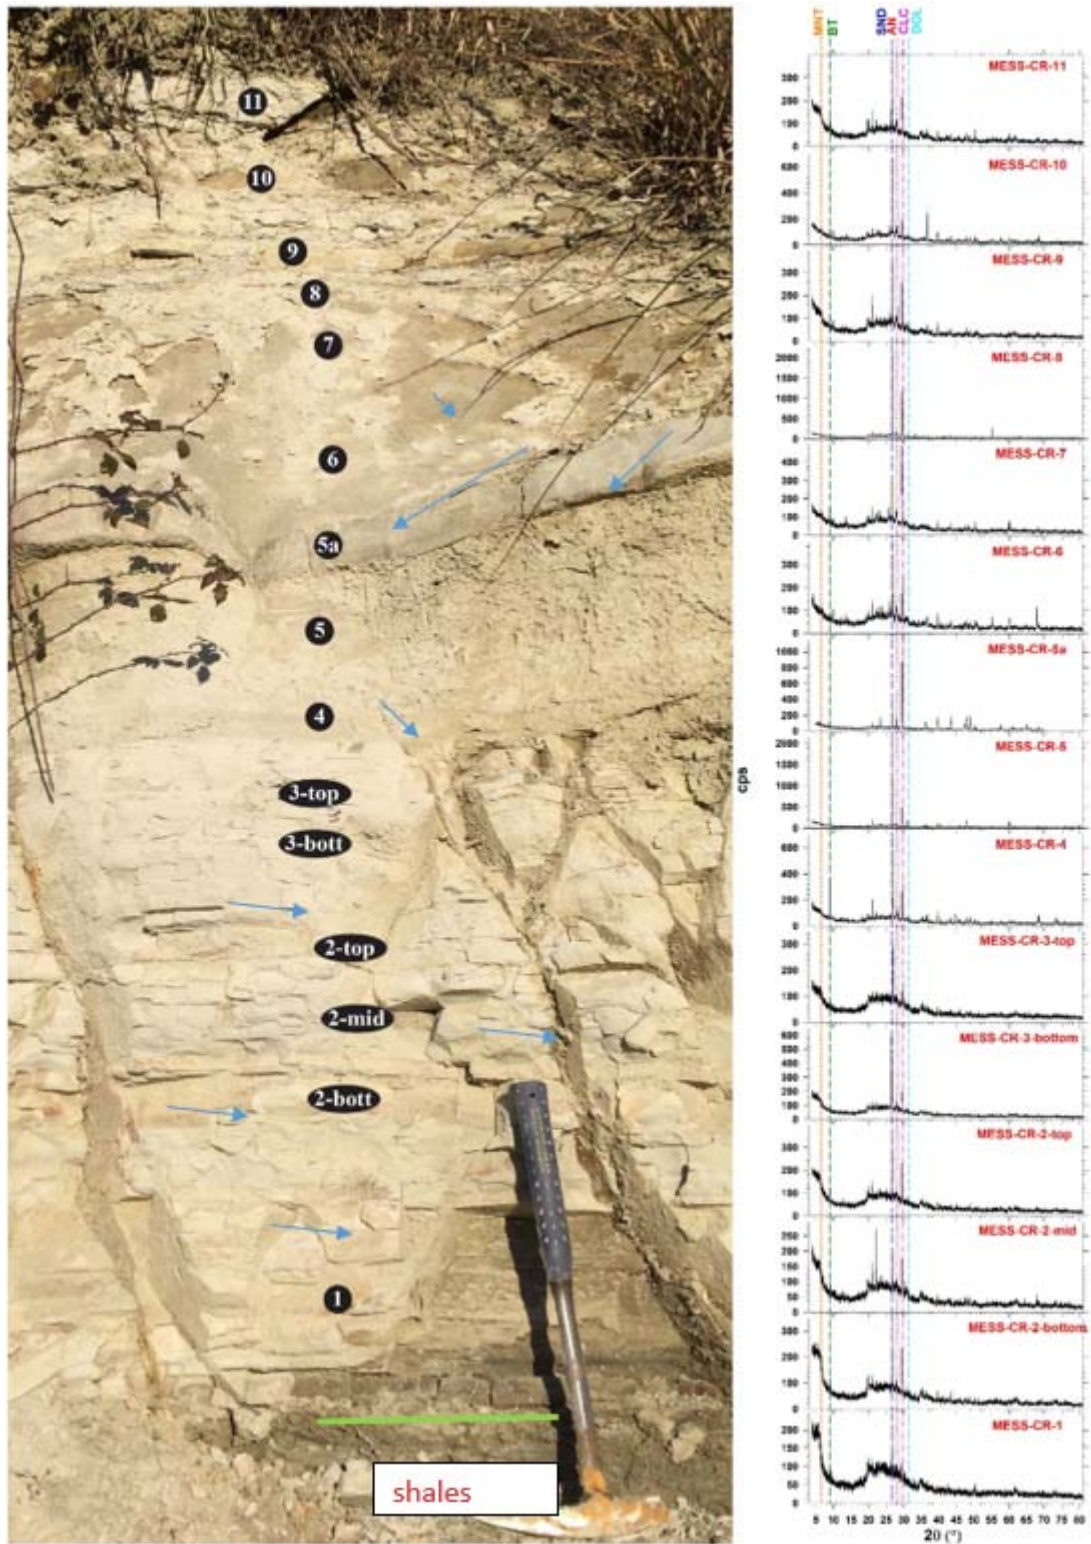

**Figure S1** An enlarged and detailed field view and specimens of the CR outcrop, with all the 15 specimens and 15 XRPD patterns.



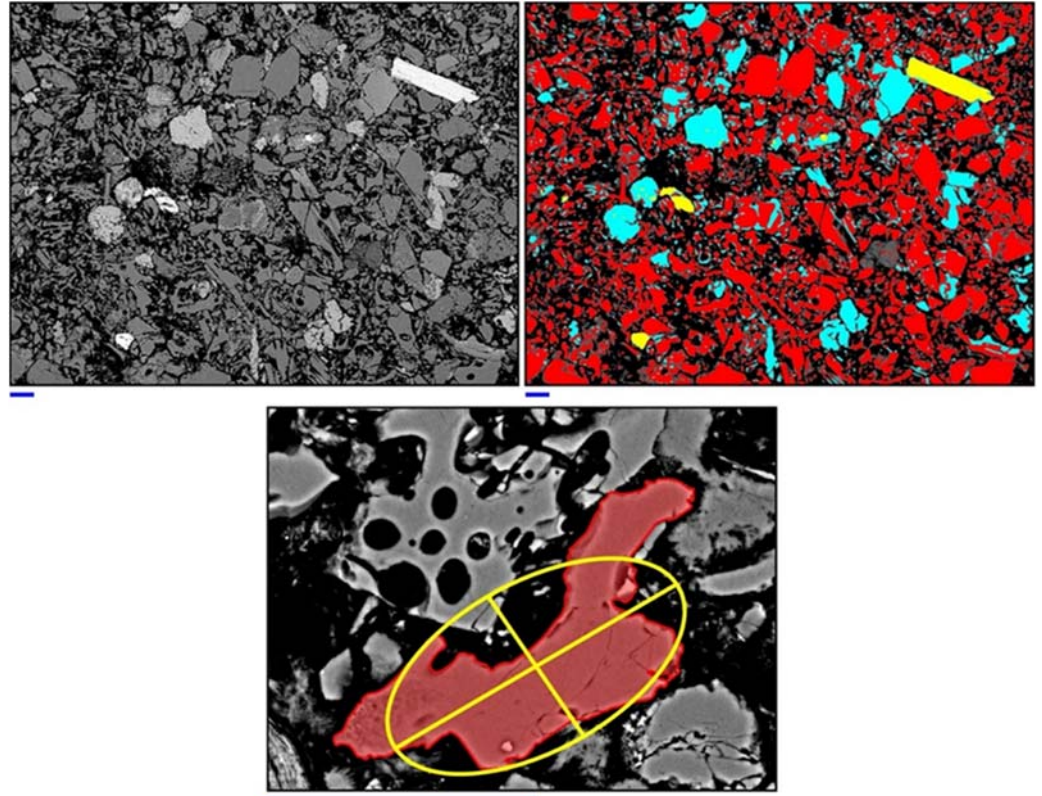

**Figure S2.** Example of image analysis on two representative samples. From left to right and up to down: BS-SEM microphotographs, segmentation in false colours and textural measurements of single objects. The false colours red, cyan and yellow corresponds to glass, carbonates and crystals, respectively. The collected textural measures concern the angle between the major axis and the horizontal, area, aspect ratio (as major axis/minor axis), perimeter, length of the major and minor axes, roundness (right column). The blue bars correspond to 50  $\mu\text{m}$ . che crystals sono?
